# Supplementary material
Source: PubMed Central journal article supplement (PMC2585135)
Supplement: supp_179_12_1263_v2_1.pdf [file supp_179_12_1263_v2_1.pdf]

**Appendix 1:** Distribution of dispensation of folic acid antagonists to pregnant women in Saskatchewan, 1980–2000, subdivided as early, middle, and late\* (part 1 of 2)

| Categories                         | Period; no. of prescriptions |                 |                  |                 |
|------------------------------------|------------------------------|-----------------|------------------|-----------------|
|                                    | Pre-conception               | First trimester | Second trimester | Third trimester |
| <b>Entire period (1980–2000)</b>   |                              |                 |                  |                 |
| Dihydrofolate reductase inhibitor† | 7096                         | 3681            | 2042             | 2392            |
| Sulfamethoxazole–trimethoprim      | 6264                         | 3169            | 1648             | 1465            |
| Triamterene–hydrochlorothiazide    | 583                          | 337             | 272              | 813             |
| Sulfasalazine                      | 178                          | 140             | 106              | 92              |
| Trimethoprim                       | 97                           | 49              | 17               | 26              |
| Other‡                             | 25                           | 11              | 3                | 6               |
| Other folic acid antagonists       | 886                          | 859             | 746              | 933             |
| Phenobarbital                      | 292                          | 359             | 378              | 536             |
| Carbamazepine                      | 265                          | 234             | 203              | 201             |
| Phenytoin                          | 231                          | 203             | 168              | 162             |
| Valproic acid                      | 78                           | 57              | 43               | 50              |
| Divalproex sodium                  | 65                           | 54              | 19               | 20              |
| Cholestyramine                     | 19                           | 14              | 14               | 51              |
| Primidone                          | 16                           | 16              | 13               | 12              |
| Other§                             | 79                           | 77              | 34               | 26              |
| <b>Early (1980–1986)</b>           |                              |                 |                  |                 |
| Dihydrofolate reductase inhibitor† | 3328                         | 1915            | 1161             | 1634            |
| Sulfamethoxazole–trimethoprim      | 2801                         | 1566            | 852              | 827             |
| Triamterene–hydrochlorothiazide    | 393                          | 244             | 234              | 747             |
| Sulfasalazine                      | 125                          | 100             | 72               | 58              |
| Trimethoprim                       | 22                           | 13              | 4                | 7               |
| Other‡                             | 17                           | 8               | 3                | 5               |
| Other folic acid antagonists       | 406                          | 440             | 399              | 541             |
| Phenobarbital                      | 190                          | 240             | 254              | 391             |
| Carbamazepine                      | 82                           | 78              | 72               | 65              |
| Phenytoin                          | 136                          | 126             | 96               | 93              |
| Valproic acid                      | 25                           | 20              | 18               | 20              |
| Divalproex sodium                  | 0                            | 0               | 0                | 0               |
| Cholestyramine                     | 2                            | 0               | 4                | 21              |
| Primidone                          | 15                           | 13              | 11               | 11              |
| Other§                             | 62                           | 66              | 26               | 24              |

Continued

**Appendix 1:** Distribution of dispensation of folic acid antagonists to pregnant women in Saskatchewan, 1980–2000, subdivided as early, middle and late\* (part 2 of 2)

| Categories                          | Period; no. of prescriptions |                 |                  |                 |
|-------------------------------------|------------------------------|-----------------|------------------|-----------------|
|                                     | Pre-conception               | First trimester | Second trimester | Third trimester |
| <b>Middle (1987–1991*)</b>          |                              |                 |                  |                 |
| Dihydrofolate reductase inhibitors  | 959                          | 471             | 252              | 248             |
| Sulfamethoxazole–trimethoprim       | 839                          | 409             | 215              | 189             |
| Triamterene–hydrochlorothiazide     | 76                           | 33              | 16               | 37              |
| Sulfasalazine                       | 23                           | 17              | 17               | 14              |
| Trimethoprim                        | 26                           | 15              | 4                | 7               |
| Other‡                              | 0                            | 1               | 0                | 1               |
| Other folic acid antagonists        | 114                          | 102             | 93               | 104             |
| Phenobarbital                       | 36                           | 40              | 43               | 58              |
| Carbamazepine                       | 42                           | 35              | 33               | 31              |
| Phenytoin                           | 32                           | 25              | 19               | 18              |
| Valproic acid                       | 10                           | 7               | 5                | 6               |
| Divalproex sodium                   | 1                            | 2               | 1                | 1               |
| Cholestyramine                      | 3                            | 4               | 1                | 4               |
| Primidone                           | 0                            | 1               | 1                | 0               |
| Other§                              | 9                            | 5               | 3                | 0               |
| <b>Late (1992–2000)</b>             |                              |                 |                  |                 |
| Dihydrofolate reductase inhibitors† | 2809                         | 1295            | 629              | 510             |
| Sulfamethoxazole–trimethoprim       | 2624                         | 1194            | 581              | 449             |
| Triamterene–hydrochlorothiazide     | 114                          | 60              | 22               | 29              |
| Sulfasalazine                       | 30                           | 23              | 17               | 20              |
| Trimethoprim                        | 49                           | 21              | 9                | 12              |
| Other‡                              | 8                            | 2               | 0                | 0               |
| Other folic acid antagonists        | 366                          | 317             | 254              | 288             |
| Phenobarbital                       | 66                           | 79              | 81               | 87              |
| Carbamazepine                       | 141                          | 121             | 98               | 105             |
| Phenytoin                           | 63                           | 52              | 53               | 51              |
| Valproic acid                       | 43                           | 30              | 20               | 24              |
| Divalproex sodium                   | 64                           | 52              | 18               | 19              |
| Cholestyramine                      | 14                           | 10              | 9                | 26              |
| Primidone                           | 1                            | 2               | 1                | 1               |
| Other§                              | 8                            | 6               | 5                | 2               |

\*Some births in the years 1987–1989 are not included in these data, because drug information was not available for the period July 1, 1987, to Dec. 31, 1988.

†Totals for each drug group refer to number of women who received prescriptions, rather than number of individual prescriptions. Because some women received more than one prescription, the total for each drug group in each period is less than the sum of the number of prescriptions for each individual drug.

‡Triamterene, methotrexate, pyrimethamine, sulfadiazine, trimethoprim (combination therapy).

§Hyoscyamine, atropine, hyoscine, phenobarbital (combination therapy).
