# Supplementary material
Source: PubMed Central journal article supplement (PMC2585135)
Supplement: supp_179_12_1263_v2_2.pdf [file supp_179_12_1263_v2_2.pdf]

**Appendix 2:** Risk of adverse pregnancy outcomes associated with degree of exposure to folic acid antagonists (in terms of number of tablets or capsules) in Saskatchewan, 1980–2000

| Outcome; no. of tablets or capsules | No. of women | Adjusted OR (95% CI)* |
|-------------------------------------|--------------|-----------------------|
| <b>Preeclampsia</b>                 |              |                       |
| Not exposed                         | 1890         | Ref                   |
| 1–20                                | 195          | 1.20 (1.01–1.41)      |
| 21–40                               | 250          | 1.39 (1.20–1.61)      |
| ≥ 40                                | 254          | 1.97 (1.68–2.30)      |
| Trend test                          |              | $p < 0.01$            |
| <b>Severe preeclampsia</b>          |              |                       |
| Not exposed                         | 139          | Ref                   |
| 1–20                                | 21           | 1.55 (0.93–2.58)      |
| 21–40                               | 24           | 1.93 (1.18–3.16)      |
| ≥ 40                                | 20           | 1.97 (1.13–3.43)      |
| Trend test                          |              | $p < 0.01$            |
| <b>Placental abruption</b>          |              |                       |
| Not exposed                         | 502          | Ref                   |
| 1–20                                | 61           | 1.38 (1.03–1.86)      |
| 21–40                               | 48           | 1.13 (0.82–1.57)      |
| ≥ 40                                | 58           | 1.30 (1.12–1.55)      |
| Trend test                          |              | $p < 0.01$            |
| <b>Fetal growth restriction</b>     |              |                       |
| <i>&lt; 3rd percentile</i>          |              |                       |
| Nonexposure                         | 2022         | Ref                   |
| 1–20                                | 172          | 1.07 (0.90–1.27)      |
| 21–40                               | 238          | 1.24 (1.07–1.44)      |
| ≥ 40                                | 212          | 1.32 (1.12–1.55)      |
| Trend test                          |              | $p < 0.01$            |
| <i>&lt; 10th percentile</i>         |              |                       |
| Not exposed                         | 6498         | Ref                   |
| 1–20                                | 510          | 1.00 (0.90–1.11)      |
| 21–40                               | 672          | 1.07 (0.98–1.17)      |
| ≥ 40                                | 564          | 1.10 (1.00–1.22)      |
| Trend test                          |              | $p < 0.01$            |
| <b>Fetal death</b>                  |              |                       |
| Not exposed                         | 266          | Ref                   |
| 1–20                                | 18           | 0.89 (0.53–1.49)      |
| 21–40                               | 28           | 1.08 (0.71–1.64)      |
| ≥ 40                                | 30           | 1.40 (0.92–2.14)      |
| Trend test                          |              | $p < 0.05$            |

Note: CI = confidence interval, OR = odds ratio.

\*Adjusted for maternal age (< 20, 20–29, ≥ 30 years, with 20–29 years as reference), type of hospital in which baby was born (provincial, community, regional, with provincial as reference), social assistance (yes v. no, with no as reference), parity (primigravida v. multipara, with multipara as reference) and year in which baby was born. The trend test was based on crude rates.
