# Supplementary material
Source: PubMed Central journal article supplement (PMC2585135)
Supplement: supp_179_12_1263_v2_3.pdf [file supp_179_12_1263_v2_3.pdf]

**Appendix 3:** Results of sensitivity analyses of the association between maternal exposure to folic acid antagonists and adverse pregnancy outcomes in Saskatchewan, 1980-2000\*

| Outcome                                                        | Exposed           | Not exposed       | Adjusted OR (95% CI)* |
|----------------------------------------------------------------|-------------------|-------------------|-----------------------|
| <b>Matching by propensity score (within 1 decimal)†</b>        | <i>n</i> = 14 982 | <i>n</i> = 14 982 |                       |
| Preeclampsia                                                   | 693               | 490               | 1.44 (1.28–1.62)      |
| Severe preeclampsia                                            | 64                | 33                | 1.95 (1.28–2.97)      |
| Placental abruption                                            | 166               | 119               | 1.40 (1.11–1.78)      |
| Fetal growth restriction, < 3rd percentile                     | 613               | 498               | 1.24 (1.10–1.40)      |
| Fetal growth restriction, < 10th percentile                    | 1 725             | 1 639             | 1.06 (0.99–1.14)      |
| Fetal death                                                    | 76                | 71                | 1.07 (0.77–1.48)      |
| <b>Restricted to exposure in first or second trimester</b>     | <i>n</i> = 6 434  | <i>n</i> = 25 711 |                       |
| Preeclampsia                                                   | 281               | 797               | 1.40 (1.21–1.61)      |
| Severe preeclampsia                                            | 27                | 49                | 2.08 (1.30–3.35)      |
| Placental abruption                                            | 64                | 229               | 1.08 (0.82–1.43)      |
| Fetal growth restriction, < 3rd percentile)                    | 316               | 885               | 1.40 (1.23–1.60)      |
| Fetal growth restriction, < 10th percentile)                   | 811               | 2 794             | 1.16 (1.06–1.26)      |
| Fetal death                                                    | 29                | 116               | 0.98 (0.65–1.47)      |
| <b>Restricted to exposure to sulfamethoxazole-trimethoprim</b> | <i>n</i> = 11 386 | <i>n</i> = 45 456 |                       |
| Preeclampsia                                                   | 409               | 1 433             | 1.13 (1.01–1.26)      |
| Severe preeclampsia                                            | 41                | 111               | 1.37 (0.95–1.98)      |
| Placental abruption                                            | 127               | 387               | 1.26 (1.03–1.55)      |
| Fetal growth restriction, < 3rd percentile)                    | 451               | 1 493             | 1.20 (1.07–1.33)      |
| Fetal growth restriction, < 10th percentile)                   | 1 300             | 4 840             | 1.05 (0.99–1.13)      |
| Fetal death                                                    | 51                | 200               | 1.03 (0.75–1.40)      |
| <b>Restricted to exposure to antiepileptics‡</b>               | <i>n</i> = 1 335  | <i>n</i> = 5 332  |                       |
| Preeclampsia                                                   | 119               | 171               | 3.08 (2.41–3.95)      |
| Severe preeclampsia                                            | 5                 | 12                | 1.63 (0.57–4.68)      |
| Placental abruption                                            | 20                | 61                | 1.20 (0.72–2.01)      |
| Fetal growth restriction, < 3rd percentile)                    | 67                | 189               | 1.37 (1.03–1.83)      |
| Fetal growth restriction, < 10th percentile)                   | 182               | 599               | 1.20 (1.00–1.43)      |
| Fetal death                                                    | 9                 | 25                | 1.42 (0.65–3.07)      |

Note: CI = confidence interval, OR = odds ratio.

\*For all analyses in this table, OR was adjusted for maternal age (< 20, 20–29, ≥ 30 years, with 20–29 years as reference), type of hospital in which the baby was born (provincial, community, regional, with provincial as reference), social assistance (yes v. no, with no as reference), parity (primigravida v. multipara, with multipara as reference) and year in which the baby was born.

†Women were matched on propensity scores calculated from maternal age, hospital type, social assistance, parity and year of birth. McNemar testing, which was used to account for matching in the analyses, revealed no differences between women who had and had not been exposed. Multiple logistic regression analyses that accounted for matching and that also adjusted for exposure status and the variables originally included in the propensity model were then performed to estimate the adjusted ORs.

‡Antiepileptics were phenobarbital, phenytoin, carbamazepine, valproic acid and divalproex sodium.
